# 1 Monitoring migratory birds in stopover habitat: 2 assessing the value of extended duration audio 3 recording

4  
5 Running title: Monitor migratory birds with audio recording

6  
7 Ellie Roark\*<sup>1</sup>, Willson Gaul<sup>2</sup>

8 <sup>1</sup>Dublin, Ireland

9 <sup>2</sup>School of Biology and Environmental Science, Earth Institute, University College Dublin, Ireland

10 \*Corresponding author: [ellieroark@gmail.com](mailto:ellieroark@gmail.com)

## 11 12 **ABSTRACT**

13 1. Because birds are frequently detected by sound, autonomous audio recorders (called automated  
14 recording units or ARUs) are now an established tool in addition to in-person observations for  
15 monitoring the status and trends of bird populations. ARUs have been evaluated and applied  
16 during breeding seasons, and to monitor the nocturnal flight calls of migrating birds. However,  
17 birds behave differently during migration stopover than during the breeding season. Here we  
18 present a method for using ARUs to monitor land birds in migration stopover habitat.

19 2. We conducted in-person point counts next to continuously recording ARUs, and compared  
20 estimates of the number of species detected and focal species relative abundance from point  
21 counts and ARUs. We used a desk-based audio bird survey method for processing audio  
22 recordings, which does not require automated species identification algorithms. We tested two

23 methods of using extended duration ARU recording: surveying consecutive minutes, and  
24 surveying randomly selected minutes.

25 3. Desk-based surveys using randomly selected minutes from extended duration ARU recordings  
26 performed similarly to point counts, and better than desk-based surveys using consecutive  
27 minutes from ARU recordings. Surveying randomly selected minutes from ARUs provided  
28 estimates of relative abundance that were strongly correlated with estimates from point counts,  
29 and successfully showed the increase in abundance associated with migration timing. Randomly  
30 selected minutes also provided estimates of the number of species present that were comparable  
31 to estimates from point counts.

32 4. ARUs are an effective way to track migration timing and intensity in remote or seasonally  
33 inaccessible migration stopover habitats. We recommend that desk-based surveys use randomly  
34 sampled minutes from extended duration ARU recordings, rather than using consecutive  
35 minutes from recordings. Our methods can be immediately applied by researchers with the  
36 skills to conduct point counts, with no additional expertise necessary in automated species  
37 identification algorithms.

### 38 **Keywords**

39 autonomous audio recording, bird survey, migration, stopover habitat, passive acoustic monitoring,  
40 point count, relative abundance

41

## 42 **1 | INTRODUCTION**

43       Conserving bird populations requires knowledge of bird distribution and habitat use at all stages  
44 of their life cycle, including during breeding, migration, and non-breeding periods (Sherry & Holmes,  
45 1995) . Monitoring birds' habitat use during migration is a necessary component of conservation plans  
46 for migratory birds. Historically, researchers have primarily relied on in-person observations including  
47 mist-netting (Peach, Buckland & Baillie, 1996) and point counts (Ralph, Droege & Sauer, 1995) for  
48 migration monitoring, but because birds are frequently detected by sound, audio recording technology  
49 offers opportunities to expand monitoring techniques. Here we present a method for using audio  
50 recorders to monitor birds in migration stopover habitat during spring migration.

51       Figuring out how to best monitor bird abundance and diversity in remote habitat is a current  
52 challenge. The climate in high latitude continental regions increases the challenges associated with  
53 accessing remote areas during spring migration. Significant annual snow accumulation, followed by  
54 rapid melting as temperature increases, makes unpaved roads impassable for several weeks each spring  
55 in much of northern North America, typically during the same time period when migrant bird species  
56 begin to arrive in the region. Developing survey monitoring protocols that can be implemented despite  
57 poor traveling conditions is a way to fill in gaps in knowledge of northern forest birds, and birds in  
58 similarly remote habitats.

59       Autonomous recording units (ARUs) are programmable audio recorders that  
60 can be deployed in the field for long time periods to efficiently maximize the spatial and temporal  
61 extent of monitoring. Passive acoustic monitoring is widely used in ecology to monitor and study  
62 vocalizing organisms; ARUs have been deployed to study bats (Tuneu-Corral et al., 2020), whales  
63 (Baumgartner et al., 2019), invertebrates (Penone et al., 2013), amphibians (Dutilleux & Curé, 2020)

64 and birds (Shonfield & Bayne, 2017). ARUs are also used to evaluate the success of conservation  
65 programs (Shonfield & Bayne, 2017). Current challenges for implementing passive acoustic  
66 monitoring include the availability of reference sound libraries, minimizing errors in species  
67 identification, and determining the relationship between acoustic index values and their associated real-  
68 world underlying parameters (Gibb, Browning, Glover-Kapfer & Jones, 2019).

69 Point-count surveys are the most commonly used bird monitoring protocol for long-term study  
70 sites (Ralph, Droege, & Sauer, 1995; Rosenstock, Anderson, Giesen, Leukering & Carter, 2002), but  
71 ARUs are now viewed as a viable supplement to point-counts, especially during the breeding season  
72 when birds vocalize frequently (Furnas & Callas, 2015; Klingbeil & Willig, 2015; Shonfield & Bayne,  
73 2017; Darras et al., 2018; Darras et al., 2019). Many researchers have compared ARUs and point  
74 counts in terms of their estimates of species richness and relative abundance or occupancy (Haselmayer  
75 & Quinn, 2000; Campbell & Francis, 2011; Tegeler, Morrison & Szewczak, 2012; La & Nudds, 2016),  
76 including in temperate forest (Klingbeil & Willig, 2015). However, none of these studies (including the  
77 23 studies reviewed in Darras et al.'s (2018) meta-analysis) compared point counts and ARUs during  
78 migration. Birds behave and vocalize differently during migration than during the breeding season  
79 (Morse, 1991; Rappole & Warner, 1976). Testing and refining migration-specific monitoring techniques  
80 for ARUs is therefore necessary to understand how data from ARUs compare to data from in-person  
81 observations.

82 ARUs are currently used during migration to record the flight calls of nocturnally migrating  
83 species. They are deployed to track the abundance of migrants as they move through an area, and can  
84 provide helpful information about migratory flyway locations, migration phenology, and relative  
85 abundance (Sanders & Mennill, 2014; Evans & Rosenburg, 2000). Understanding how migrating birds  
86 use migratory stopover habitat is a different challenge, and requires different methods. Determining

87 how birds are distributed in stopover habitat, the relative abundance and species richness of birds in  
88 such habitat, and the timing of arrival and departure from the stopover area are all important research  
89 questions for applied conservation.

90 To take advantage of the large volume of data generated by continuously recording ARUs,  
91 researchers are actively developing methods for automated identification of vocalizing organisms  
92 (Salamon et al., 2016; Gibb, Browning, Glover-Kapfer & Jones, 2019). In contrast, we present a  
93 method that can be implemented by anyone with the skills to conduct point counts, that does not rely  
94 on machine learning for species identification and data processing. Because applications of ARUs in  
95 migration stopover habitat have been under-explored in the literature thus far, we demonstrated and  
96 assessed an immediately applicable monitoring technique.

97 We compared data from ARU surveys to in-person point count surveys during spring migration  
98 in the northern Great Lakes region of the United States. Our goal was to understand how ARUs could  
99 be applied to monitor diurnal stopover habitat use during migration by examining whether ARUs could  
100 provide estimates of relative abundance and number of species that are comparable to estimates from  
101 in-person surveys. We asked the following questions. 1) What are the differences between the number  
102 of species detected using point counts and using ARUs? 2) Can ARUs give estimates of relative  
103 abundance for focal species that are correlated with estimates of relative abundance from point counts?  
104 3) Can randomly sampling from extended duration audio recordings provide better estimates of focal  
105 species abundance or the number of species detected than consecutive minutes of audio recording?

106

107

## 108 **2 | MATERIALS AND METHODS**

109 We conducted in-person point counts alongside continuously recording ARUs on the southern  
110 shore of Lake Superior during two months at the start of spring migration. We compared both raw data  
111 and model-based estimates of the number of species detected and focal species abundance from point  
112 counts and ARUs.

### 113 **2.1 | Study site**

114 We conducted field work in a 2.7 km<sup>2</sup> area on the Point Abbaye peninsula in Baraga County,  
115 Michigan, USA (Fig. 1). Surveys took place from 2 April to 22 May 2019, and were conducted daily  
116 unless prevented by weather conditions. Field work was designed to coincide with the arrival and peak  
117 abundance of early season migrating birds. Point Abbaye juts into the southern part of Lake Superior  
118 and comprises the western border of Keweenaw Bay. Habitat included forested wetland, upland  
119 hardwood, and hardwood forest disturbed by recent logging activity. We selected survey sites randomly  
120 across the study area. All spatial analyses were done in the R programming language using the 'rgdal',  
121 'geosphere', 'rgeos', 'sp', 'mapproj', and 'spatstat' packages (Baddeley, Rubak, & Turner, 2015; Bivand,  
122 Keitt, & Rowlingson, 2018; Bivand & Lewin-Koh, 2019; Bivand & Rundel, 2018; Bivand, Pebesma, &  
123 Gomez-Rubio, 2013; Hijmans, 2019; Pebesma & Bivand, 2005; R Core Team, 2020). We conducted a  
124 pilot study in 2018 to test our protocols and evaluate the accessibility of our randomly selected survey  
125 locations. See Appendix A for details about pilot year surveys, and survey site and date selection.

### 126 **2.2 | Automated recording units**

127 Birds were recorded using three SWIFT bioacoustic recorder rugged units (Cornell Lab of  
128 Ornithology, Ithaca, NY, USA), and one AudioMoth bioacoustic recorder that was housed in a thin  
129 plastic bag for light weather proofing (Hill et al., 2018; Open Acoustic Devices, Southampton, UK).  
130 SWIFT units used a built in PUI Audio brand omni-directional microphone. The AudioMoth unit used

131 an analog microelectro-mechanical systems (MEMS) microphone. We refer to both the SWIFT and  
132 AudioMoth units as “automated recording units” (ARUs). ARUs recorded at a sampling rate of 48 kHz  
133 and saved recordings as uncompressed .WAV files. The signal to noise ratio reported by device  
134 manufacturers is approximately 58 dB for the SWIFT units, and approximately 44 dB for the  
135 AudioMoth unit.

## 136 **2.4 | Field survey methods**

137 ARUs recorded continuously for five hours each day, beginning within 10 minutes of local  
138 sunrise time (United States Naval Observatory, 2016). ARUs were attached to trees less than 0.6 m in  
139 diameter, and were placed 1.5–2 m above the ground (Darras et al., 2018). The SWIFT omni-  
140 directional microphones were always oriented downward to prevent precipitation landing directly on  
141 the microphone. After the five hour recording period ended each day, ARUs were moved to new  
142 locations for the next day’s samples, thereby rotating the ARU and point count samples through all 18  
143 survey locations approximately every five days. The sampling order for the points was chosen  
144 randomly.

145 Point counts were conducted daily next to each ARU during the five hour recording period.  
146 Point counts involved recording all birds seen and heard at an unlimited distance during a stationary,  
147 10-minute count. We did not survey in high wind or heavy precipitation. See Appendix A for detailed  
148 point count protocols.

## 149 **2.5 | Desk-based audio surveys**

150 We conducted desk-based audio bird surveys by listening to ARU recordings played through  
151 headphones on a laptop computer in the lab after the end of the field season. We tested three types of  
152 desk-based audio surveys: 1) we listened to a recording of the 10 consecutive minutes during which the

153 in-person point count was conducted; 2) we listened to 24 minutes selected randomly from the five  
154 hour recording duration; 3) we sampled a subset of 10 of the 24 random minutes (without listening to  
155 those minutes again). Our goal was to compare each of these desk-based ARU survey methods to in-  
156 person point count observations.

157 For each audio file, the desk-based survey technician noted the identity of each bird species that  
158 vocalized, the type of vocalization, and the 30-second time intervals in which each species vocalized.  
159 Detailed protocols for completing desk-based audio surveys can be found in Appendix A, and a  
160 completed data sheet from a desk-based survey is shown in Fig. S6. We sampled 24 random minutes  
161 from each ARU on each day because we wanted at least 20 minutes without anthropogenic disturbance.  
162 After discarding randomly selected minutes that contained a human voice, we were ultimately able to  
163 use data from 22 randomly selected minutes from each ARU on each survey day (i.e. we never had to  
164 discard more than two of the 24 randomly selected minutes because of human voices).

## 165 **2.6 | Indices for observed number of species and relative abundance**

166 We summed the number of unique species detected ( $S$ ) separately using each survey type: 10-  
167 minute, in-person point counts ( $S_p$ ); 10 consecutive minute ARU surveys ( $S_{10C}$ ); 10 random minute  
168 ARU surveys ( $S_{10R}$ ); and 22 random minute ARU surveys ( $S_{22R}$ ) (Box 1). We calculated a value of  $S$  for  
169 each individual survey on each day, resulting in three or four values of  $S$  for each survey type on each  
170 day.

171 We created an index of daily relative abundance ( $A$ ) for two focal species (*Regulus satrapa*  
172 (Golden-crowned Kinglet) and *Troglodytes hiemalis* (Winter Wren)) using each survey type (Box 1).  
173 Our relative abundance indices were: the mean observed number of individuals per point count ( $A_p$ );  
174 the proportion of 30-second intervals with a vocalization calculated by surveying  $n$  minutes in sections



175 of 10 consecutive minutes ( $A_{nC}$ ); the proportion of 30-second intervals with a vocalization calculated by  
176 surveying  $n$  minutes in sections of one minute chosen randomly from the five hour survey window  
177 ( $A_{nR}$ ). To reduce the number of zero abundance counts in our data, we calculated relative abundance  
178 indices by grouping all surveys of each type for each day, so there was a single value for each  
179 abundance index on each day. Note that while April 16<sup>th</sup> and 17<sup>th</sup> data appear on plots and in results,  
180 ARU malfunctions on those dates made the number of sampled minutes  $n$  different for those two dates  
181 for some of our abundance indices. See Appendix A for detailed discussion of sample size on these  
182 dates.

## 183 **2.7 | Statistical Analysis**

### 184 **2.7.1 | Observed number of species**

185 To determine whether the survey type ( $S_{10C}$ ,  $S_{10R}$ ,  $S_{22R}$ ) significantly influenced the number of  
186 species detected, we modeled the number of species detected using a generalized linear mixed model  
187 (GLMM) with a Poisson error distribution and log link function, using the ‘lme4’ package in R (Bates,  
188 Maechler, Bolker, & Walker, 2015; R Core Team, 2020). Our fixed effects were survey type, day of  
189 year, a second degree polynomial term for day of year, wind, rain, noise, and interaction terms for day  
190 of year x survey type, and survey type x rain. We also used day of year as a random effect; we collected  
191 up to four samples of each of four survey types per day, and new birds potentially arrived daily during  
192 the study period, so we expected that the number of species detected by all surveys on each day would  
193 be strongly correlated, regardless of survey location or survey type. More information about our  
194 GLMM can be found in Appendix A.

### 195 **2.7.2 | Relative abundance**

196 We compared relative abundance estimates for our two focal species using data from  $A_p$  and  
197 from each of the three desk-based audio survey types ( $A_{30C}$ ,  $A_{30R}$ ,  $A_{66R}$ ). Winter Wrens were abundant in

198 the survey area, and vocalized frequently and loudly during early spring, representing a “best case”  
199 scenario for detectability on ARU recordings. Golden-crowned Kinglets were abundant in the survey  
200 area, but vocalized quietly (though regularly) during early spring, and so represent a greater challenge  
201 for detection using ARUs.

202 We produced a total of eight relative abundance models, one using each of our four relative  
203 abundance indices for each of our two focal species. For each relative abundance model, we fit  
204 boosted regression trees (BRTs) (Elith, Leathwick, & Hastie, 2008; Friedman, 2001) using 200  
205 iterations of five-fold temporal block cross validation, that used blocks of three consecutive days (Fig.  
206 S3; Roberts et al., 2017). This resulted in a total of 1000 BRT fits per relative abundance model. We  
207 generated predicted relative abundances by averaging predictions from the 1000 fits of each model. The  
208 predictor variables in our model were day of year (continuous) and wind speed (categorical with three  
209 levels representing Beaufort forces of 0-1, 2, or 3 or higher). We fit BRTs with the ‘gbm’ package in R  
210 (Greenwell, Boehmke, Cunningham and GBM Developers, 2019; R Core Team, 2020). Details of  
211 BRTs, including model tuning and control of overfitting are in Appendix A, and Figs. S4-S5.

212 We assessed the correlation between the observed data from our four abundance indices using  
213 scatter plots and Spearman’s rank correlation coefficient. We also assessed correlation between the  
214 predicted values from the BRT models trained using data from each of the four abundance indices. We  
215 calculated Spearman’s rank correlation coefficient for all pairwise combinations of abundance indices,  
216 with the exception  $A_{30R}$  and  $A_{66R}$ , since the data for  $A_{30R}$  is a sub-sample of  $A_{66R}$  data.

### 217 **3 | RESULTS**

218 Between 2 April and 22 May, 2019, we were able to survey on 37 days. During that time, we  
219 conducted 137 in-person point counts. All four audio recorders experienced occasional malfunctions

220 that prevented us from recording the full five-hour survey window with some units on some days. One  
221 SWIFT unit recorded 36 five-hour survey days, two SWIFT units recorded 35 five-hour survey days,  
222 and the AudioMoth unit recorded 24 five-hour survey days, for a total of 650 hours recorded by ARUs.  
223 Because of ARU malfunctions, on some days ARUs did not record the full five-hour period, but we  
224 were able to manually turn on the units for the 10-minute period during the in-person point count.  
225 Therefore, we recorded 130 10 consecutive minute periods with ARUs (during which a human observer  
226 was present conducting a simultaneous point count) on 37 survey days, but only 124 periods of 22  
227 randomly selected minutes on 36 survey days. A complete list of the species detected by each survey  
228 method can be found in Table S1.

### 229 **3.1 | Observed number of species**

230 A chi-square ANOVA comparing our full model to a null model with survey type removed  
231 showed that survey type (the  $S$ -index used) had a significant effect on the number of species detected  
232 ( $\chi^2_{9,21} = 247, p < 0.0001$ ). We detected a similar number of species using  $S_{10R}$  as we did using  $S_p$  (Fig. 2;  
233 Table 1; change in the log of the number of species detected = -0.065, 95% CI [-0.2; 0.08],  $p = 0.3888$ ).  
234 Using  $S_{22R}$ , we detected significantly more species than by using  $S_p$  (Fig. 2; Table 1; change in the log  
235 of the number of species detected = 0.305, 95% CI [0.17; 0.44],  $p < 0.0001$ ). We detected fewer species  
236 using  $S_{10C}$  than using  $S_p$  (Fig. 2; Table 1; change in the log of the number of species detected = -0.614,  
237 95% CI [-0.78; -0.44],  $p < 0.0001$ ). Listening to randomly selected rather than consecutive minutes  
238 eliminated the gap in number of species detected between 10-minute point counts and 10-minute ARU  
239 surveys (Fig. 2). Day of year had a significant effect on the number of species detected (Table 1), with  
240 more species expected later in the migration season (Fig. 2).

241 Chi-square ANOVA showed that the overall effect of wind was not significant ( $\chi^2_{19, 21} = 1.44$ ,  $p =$   
242 0.48), nor was the overall effect of rain ( $\chi^2_{18, 21} = 3.45$ ,  $p = 0.32$ ). The overall effect of noise was  
243 significant ( $\chi^2_{19, 21} = 10.3$ ,  $p = 0.005$ ). The interaction between survey type and day of year was not  
244 significant (Table 1), providing no evidence of a difference in the effect of survey method on the  
245 observed number of species over the course of the survey season.

### 246 **3.2 | Relative abundance models**

247 BRT models of relative abundance over time differed in how well they showed the initial period  
248 of absence, and the increase in abundance corresponding with the arrival of migrant birds in our study  
249 area, depending on the survey method used (Fig. 3). The general pattern of initial absence followed by  
250 arrival of migrants can be seen in both the raw data and the model predictions of relative abundance for  
251  $A_p$ ,  $A_{30R}$  and  $A_{66R}$  for Winter Wrens (Fig. 3 a, c and d), and for  $A_p$  and  $A_{66R}$  for Golden-crowned Kinglets  
252 (Fig. 3 e, and h).

253 For both Winter Wrens and Golden-crowned Kinglets, the observed abundance indices from  
254 ARU surveys were positively correlated with the observed abundance index from point counts (Fig. 4,  
255 Fig. 5), indicating that the relative abundance proxies we calculated using ARUs are comparable to  
256 relative abundance estimates from in-person observations. Winter Wren showed moderate to strong  
257 correlation between the observed abundance index values from point counts and from ARU surveys  
258 (Fig. 4, Table 2). Abundance indices for Golden-crowned Kinglets were less correlated than for Winter  
259 Wrens, with weak correlation between  $A_{30C}$  and  $A_{30R}$  in particular (Fig. 5, Table 2). Correlations for  
260 predicted values of our abundance indices were moderate to strong for both species (Figs. S1-S2), and  
261 were higher than correlation coefficients for observed values of the same index pairs (Table 2). The

262 strong correlation between predicted values of the abundance indices indicates that our models found  
263 the same underlying signal regardless of whether training data were from ARUs or point counts.

264 For Winter Wrens, observed abundance indices using randomly selected minutes from ARUs  
265 ( $A_{30R}$ ,  $A_{66R}$ ) were more closely correlated with the observed abundance index from point counts ( $A_P$ ) than  
266 was the abundance index from 10 consecutive minute ARU surveys ( $A_{30C}$ ). For both species,  $A_P$  was  
267 most strongly correlated with  $A_{66R}$ .

## 268 **4 | DISCUSSION**

269 Importantly, abundance models trained with ARU data showed the increase in relative  
270 abundance indicating the arrival of migrants at the study site, suggesting that ARUs can be used to  
271 track migration phenology in stopover habitat for vocal species. ARUs also provided similar estimates  
272 of the number of species detected as point counts when analyzing randomly sampled minutes. Our  
273 results suggest that ARUs recording for an extended duration in migration stopover habitat can be just  
274 as effective as in-person point counts for monitoring migrating land birds.

275 Data from randomly selected minutes of ARU recordings detected more species and produced  
276 modeled abundance estimates that better showed the expected seasonal pattern of migration timing than  
277 data from consecutive minutes of ARU recordings. There are two likely explanations for this. First,  
278 randomly selected minutes are less temporally auto-correlated than consecutive minutes. For example,  
279 during a 10-minute in-person point count, little new information is gained during the seventh minute of  
280 the survey compared to what was collected during the sixth minute of the survey; a Winter Wren  
281 singing near the end of the sixth minute of a point count survey will likely still be singing in the  
282 beginning of the seventh minute. By selecting minutes randomly from across the five-hour survey  
283 window, the temporal correlation between each successive minute that is analyzed is minimized.

284 Second, during migration stopover, birds may move more and farther distances within the study area  
285 than they would during the breeding season, when they have established a territory. The community of  
286 birds within the immediate detection radius of an observer (either a person or a recording ARU) may  
287 therefore change over the course of five hours. Using randomly selected minutes provides a more  
288 complete sample of the birds using a spatial location over the entire course of the survey window.

289 For in-person point counts, the time taken to travel to a survey site takes up a major portion of  
290 the total time invested, so site visits are typically limited to once per day. With ARUs, no such  
291 constraints exist; it is possible to do multiple short-duration surveys from many locations over the  
292 course of one day without additional travel and field work logistics. We recommend that studies using  
293 ARUs on migration should randomly sample recordings of short periods of time (e.g. one-minute  
294 recordings) from a defined survey window relevant to the study question (e.g. the five hours following  
295 sunrise for passerines in temperate forest, or twilight to dawn for crepuscular and nocturnal species). In  
296 many studies using ARUs during the breeding season, researchers listened to consecutive minutes of  
297 recordings (e.g. 10 minutes or 2 minutes in Klingbeil & Willig (2015)). Given the improvement we saw  
298 when listening to random rather than consecutive minutes from an extended duration recording, we  
299 recommend that future studies using ARUs to monitor birds during wintering or breeding seasons test  
300 whether randomly selected minutes provide a more effective sample than consecutive minutes.

301 We did not detect an effect of either wind or rain in our model of the number of species detected.  
302 However, because we controlled for adverse weather conditions during our field surveys by not  
303 surveying on rainy or windy days, the number of high wind values in our data was low, as was the  
304 number of rainy survey days. We also noted anecdotally that occasionally the wind values recorded in  
305 person for a survey day did not correlate with the amount of wind heard while conducting our desk-  
306 based audio surveys; we speculate that wind direction in relation to the microphone may make a

307 difference in how much wind is actually picked up by the ARU. Given that wind and rain have an  
308 effect on the detectability of birds in the study system (Ralph, Droege & Sauer, 1995), they remain  
309 important predictors to include, whether or not they appear significant in our model. Likewise, we  
310 suspect that the insignificance of the polynomial day of year term is due to sample size limitations.

311         Interpreting the significance of the noise variable is challenging, because we used the variable to  
312 describe all non-avian noise in the environment, which could include waves, airplanes, and frogs. We  
313 suspect that the overall significance of the noise variable may be due to frogs. Future studies may want  
314 to carefully consider whether they wish to distinguish between other vocalizing taxa and surrounding  
315 environmental noise. ARUs can be used to simultaneously sample multiple taxa (e.g. crickets and bats;  
316 Newson, Bas, Murray & Gillings, 2017) so researchers may want to incorporate analyses of non-bird  
317 biotic noise into study designs.

318         Estimates of abundance are more useful than estimates of occupancy for prioritizing  
319 conservation resources at dynamic temporal scales, such as during migration (Johnston et al., 2015).  
320 ARUs do not solve the problem of how to estimate true abundance in stopover habitat during  
321 migration. Imperfect detection means that the number of individuals detected is not necessarily a good  
322 estimate of the number of individuals present (MacKenzie & Kendall, 2002). Hierarchical models that  
323 account for imperfect detection (MacKenzie et al., 2002; Kéry & Royle, 2016) rely on assumptions  
324 about population closure that may be badly violated during migration, when birds do not adhere to  
325 territories and are present in stopover habitat for short periods of time. The period in which we can  
326 reasonably assume population closure for our study area during migration may be as short as several  
327 hours or as long as several days, depending on weather conditions. Therefore disentangling true  
328 occupancy or abundance from detectability is difficult, whether using traditional in-person survey  
329 methods or ARUs. Using a relative abundance index that does not account for detection probability

330 could result in misleading estimates of abundance if detection probability is not constant (MacKenzie  
331 & Kendall, 2002). It is possible that individual birds' vocalizations may increase over the spring  
332 migration period, as birds prepare for the breeding season. Using our abundance indices, increases in  
333 vocalizations would look like an increase in relative abundance, but the apparent increase would  
334 merely be an artifact of changing detectability. However, given the moderate (for Golden-crowned  
335 Kinglets) and strong (for Winter Wrens) correlation between  $A_p$  (observed abundance from point  
336 counts) and our ARU abundance indices, we believe increases in relative abundance seen in our model  
337 results (Fig. 3) are not mere artifacts of changes in detectability, but rather show real increases in  
338 abundance associated with the arrival of our focal species in the study area. ARUs can therefore  
339 provide valuable data about migration phenology and stopover habitat use, even if they cannot be used  
340 to estimate true abundance.

341 Differences in how well relative abundance models captured the arrival of migrants seemed to be  
342 partly dictated by how well aggregating detections by day reduced the number of "zero" counts in our  
343 data. For Golden-crowned Kinglets, the  $A_p$  and  $A_{66R}$  models seemed to be effective at detecting the  
344 increase in abundance associated with initial arrival, though they did not capture a peak of abundance,  
345 if one existed during the study period. It is unclear whether days with high counts of Golden-crowned  
346 Kinglets represent a real pulse of newly arrived birds, or the same birds already present in the region  
347 clustering more densely, or just random variation around a more or less constant number of individuals.  
348 A dense network of simultaneously recording ARUs in the region could help answer this question.  
349 Future studies might also consider increasing ARU survey effort beyond our maximum of 66 randomly  
350 selected minutes per day. The improvement in our models associated with increasing from 30 to 66  
351 minutes suggests that increasing the number of minutes surveyed is beneficial.



352 Future studies using ARUs to monitor bird migration may wish to take advantage of ARUs'  
353 unique ability to scale research in ways that may be infeasible or prohibitively expensive for in-person  
354 field work. For example, ARUs could be deployed in dense, small-scale networks to examine micro-  
355 habitat use in stopover regions. Alternatively, they could be deployed on a latitudinal gradient covering  
356 hundreds or thousands of kilometers to examine how vocal behavior changes over the spring migration  
357 period as birds approach their breeding grounds.

358 Applying the methods described here can facilitate an increase in survey effort in difficult-to-  
359 access migratory stopover habitat in high latitude forests. Temporal variation in accessibility in these  
360 habitats is dramatic, as unpaved roads typically turn from snow to slush to impassable mud before  
361 hardening into reliably dry surfaces in early summer. ARUs can eliminate many of the restrictive  
362 logistics and safety concerns for researchers interested in monitoring spring migration. Our method of  
363 using desk-based surveys of randomly selected minutes from ARUs can be used by any researcher with  
364 the skills to conduct point counts. Researchers can set up ARUs during winter conditions when access  
365 to study sites over snow is relatively easy (e.g. using snowmobiles, skis or snowshoes), and revisit to  
366 collect the audio data once conditions have stabilized in late spring. Our methods for using ARU data to  
367 model relative abundance of focal species and the number of species present during migration can be  
368 immediately applied to increase monitoring effort in logistically difficult regions.

### 369 **Acknowledgments**

370 This work was funded by grants to ER from the Wilson Ornithological Society and the Copper Country  
371 Audubon Society. Land access and logistical support was provided by the Keweenaw Land Trust and  
372 Pat Toczydlowski. We are deeply grateful to Calvin and Steve Koski, Mark Summersett, and Bob and  
373 Nancy Korth for their support and assistance with transportation to the study site in difficult and  
374 unpredictable conditions. Our thanks also to Joseph Youngman, David Flaspohler, Drew Meyer and

375 Dana Neufield for assistance with the pilot year surveys, and to Jon Yearsley, Hannah White, and the  
376 Ecological Modeling lab at University College Dublin for consultation on modeling methods. WG was  
377 funded during this work by Science Foundation Ireland grant number 15/IA/2881.

### 378 **Author Contributions**

379 ER and WG developed the study design and methodology; ER prepared for and performed all field  
380 work, and conducted all desk-based audio surveys; ER and WG conducted the data analysis, wrote the  
381 manuscript, and gave final approval for publication.

### 382 **Data Availability Statement**

383 Data and code to reproduce analyses can be found at <https://doi.org/10.5281/zenodo.3964500>  
384 (ellieroark, 2020). Audio recording files used to produce this analysis are archived at  
385 <https://doi.org/10.5281/zenodo.3964574> (Roark & Gaul, 2020).

### 386 **References**

- 387 Baddeley, A., Rubak, E., & Turner, R. (2015). *Spatial Point Patterns: Methodology and Applications*  
388 *with R*. Retrieved from [http://www.crcpress.com/Spatial-Point-Patterns-Methodology-and-](http://www.crcpress.com/Spatial-Point-Patterns-Methodology-and-Applications-with-R/Baddeley-Rubak-Turner/9781482210200/)  
389 [Applications-with-R/Baddeley-Rubak-Turner/9781482210200/](http://www.crcpress.com/Spatial-Point-Patterns-Methodology-and-Applications-with-R/Baddeley-Rubak-Turner/9781482210200/)
- 390 Bates, D., Maechler, M., Bolker, B., & Walker, S. (2015). Fitting Linear Mixed-Effects Models Using  
391 *lme4*. *Journal of Statistical Software*, 67(1), 1–48. <https://doi.org/10.18637/jss.v067.i01>
- 392 Baumgartner, M. F., Bonnell, J., Van Parijs, S. M., Corkeron, P. J., Hotchkin, C., Ball, K., ... Kraus, S.  
393 D. (2019). Persistent near real-time passive acoustic monitoring for baleen whales from a moored  
394 buoy: System description and evaluation. *Methods in Ecology and Evolution*, 10(9), 1476–1489.  
395 <https://doi.org/10.1111/2041-210X.13244>
- 396 Beaufort, F. (1805). Beaufort Wind Scale. Retrieved July 28, 2020, from NOAA.gov website:  
397 <https://www.spc.noaa.gov/faq/tornado/beaufort.html>
- 398 Bivand, R., Keitt, T., & Rowlingson, B. (2018). *rgdal: Bindings for the “Geospatial” Data Abstraction*  
399 *Library*. Retrieved from <https://cran.r-project.org/package=rgdal>
- 400 Bivand, R., & Lewin-Koh, N. (2019). *mapproj: Tools for Handling Spatial Objects*. Retrieved from  
401 <https://cran.r-project.org/package=mapproj>

- 402 Bivand, R., & Rundel, C. (2018). *rgeos: Interface to Geometry Engine- Open Source ('GEOS')*.  
403 Retrieved from <https://cran.r-project.org/package=rgeos>
- 404 Bivand, R. S., Pebesma, E. J., & Gomez-Rubio, V. (2013). *Applied spatial data analysis with R* (2nd  
405 ed.). Retrieved from <http://www.asdar-book.org/%0A>
- 406 Campbell, M., & Francis, C. M. (2011). Using Stereo-Microphones to Evaluate Observer Variation In  
407 North American Breeding Bird Survey Point Counts. *The Auk*, *128*(2), 303–312.  
408 <https://doi.org/10.1525/auk.2011.10005>
- 409 Darras, K., Batáry, P., Furnas, B., Celis-Murillo, A., Van Wilgenburg, S. L., Mulyani, Y. A., &  
410 Tschardtke, T. (2018). Comparing the sampling performance of sound recorders versus point  
411 counts in bird surveys: A meta-analysis. *Journal of Applied Ecology*, *55*(6), 2575–2586.  
412 <https://doi.org/10.1111/1365-2664.13229>
- 413 Darras, K., Batáry, P., Furnas, B. J., Grass, I., Mulyani, Y. A., & Tschardtke, T. (2019). Autonomous  
414 sound recording outperforms human observation for sampling birds: a systematic map and user  
415 guide. *Ecological Applications*, *29*(6). <https://doi.org/10.1002/eap.1954>
- 416 Dutilleul, G., & Curé, C. (2020). Automated acoustic monitoring of endangered common spadefoot  
417 toad populations reveals patterns of vocal activity. *Freshwater Biology*, *65*(1), 20–36.  
418 <https://doi.org/10.1111/fwb.13111>
- 419 Elith, J., Leathwick, J. R., & Hastie, T. (2008). A working guide to boosted regression trees. *Journal of*  
420 *Animal Ecology*, *77*(4), 802–813. <https://doi.org/10.1111/j.1365-2656.2008.01390.x>
- 421 ellieroark. (2020, July 28). ellieroark/StopoverHabitatMonitoring: First release of Stopover Habitat  
422 Monitoring project code (Version v1.0.0). *Zenodo*. <http://doi.org/10.5281/zenodo.3964500>
- 423 Evans, W. R., & Rosenberg, K. V. (2000). Acoustic Monitoring of Night-Migrating Birds : A Progress  
424 Report. In: Strategies for bird conservation: creating the Partners in Flight planning process.  
425 Proceedings of the 3rd Partners in Flight Workshop. US Department of Agriculture, Forest  
426 Service.
- 427 Friedman, J. (2001). Greedy Function Approximation : A Gradient Boosting Machine. *The Annals of*  
428 *Statistics*, *29*(5), 1189–1232. <https://doi.org/10.1214/009053606000000795>
- 429 Furnas, B. J., & Callas, R. L. (2015). Using automated recorders and occupancy models to monitor  
430 common forest birds across a large geographic region. *Journal of Wildlife Management*, *79*(2),  
431 325–337. <https://doi.org/10.1002/jwmg.821>
- 432 Gibb, R., Browning, E., Glover-Kapfer, P., & Jones, K. E. (2019). Emerging opportunities and  
433 challenges for passive acoustics in ecological assessment and monitoring. *Methods Ecol Evol*, *10*,  
434 169–185. <https://doi.org/10.1111/2041-210X.13101>

- 435 Greenwell, B., Boehmke, B., Cunningham, J., & GBM Developers. (2019). *gbm: Generalized Boosted*  
436 *Regression Models. R package version 2.1.5*. R package version 2.1.5.
- 437 Haselmayer, J., & Quinn, J. S. (2000). A Comparison of Point Counts and Sound Recording as Bird  
438 Survey Methods in Amazonian Southeast Peru. *The Condor*, 102(4), 887–893. Retrieved from  
439 <http://www.jstor.org/stable/1370317>
- 440 Hijmans, R. J. (2019). *geosphere: Spherical Trigonometry*. Retrieved from  
441 <https://cran.r-project.org/package=geosphere>
- 442 Hill, A. P., Prince, P., Piña Covarrubias, E., Doncaster, C. P., Snaddon, J. L., & Rogers, A. (2018).  
443 AudioMoth: Evaluation of a smart open acoustic device for monitoring biodiversity and the  
444 environment. *Methods in Ecology and Evolution*, 9(5). <https://doi.org/10.1111/2041-210X.12955>
- 445 Johnston, A., Fink, D., Reynolds, M. D., Hochachka, W. M., Sullivan, B. L., Bruns, N. E., ... Kelling,  
446 S. (2015). Abundance models improve spatial and temporal prioritization of conservation  
447 resources. *Ecological Applications*, 25(7), 1749–1756. <https://doi.org/10.1890/07-1650.1>
- 448 Kéry, M., & Royle, J. A. (2016). Applied hierarchical modeling in ecology: analysis of distribution,  
449 abundance and species richness in R and BUGS (volume 1 – prelude and static models). London:  
450 Academic Press.
- 451 Klingbeil, B. T., & Willig, M. R. (2015). Bird biodiversity assessments in temperate forest: the value of  
452 point count versus acoustic monitoring protocols. *PeerJ*, 3, e973. <https://doi.org/10.7717/peerj.973>
- 453 La, V. T., & Nudds, T. D. (2016). Estimation of avian species richness: biases in morning surveys and  
454 efficient sampling from acoustic recordings. *Ecosphere*, 7(4), e01294.  
455 <https://doi.org/10.1002/ecs2.1294>
- 456 MacKenzie, D. I., & Kendall, W. C. (2002). How should detection probability be incorporated into  
457 estimates of relative abundance? *Ecology*, 83(9), 2387–2393. [https://doi.org/10.1890/0012-9658\(2002\)083\[2387:HSDPBI\]2.0.CO;2](https://doi.org/10.1890/0012-9658(2002)083[2387:HSDPBI]2.0.CO;2)
- 459 MacKenzie, D. I., Nichols, J. D., Lachman, G. B., Droege, S., Royle, A. A., & Langtimm, C. A. (2002).  
460 Estimating site occupancy rates when detection probabilities are less than one. *Ecology*, 83(8),  
461 2248–2255. [https://doi.org/10.1890/0012-9658\(2002\)083\[2248:ESORWD\]2.0.CO;2](https://doi.org/10.1890/0012-9658(2002)083[2248:ESORWD]2.0.CO;2)
- 462 Morse, D. H. . (1991). Song Types of Black-Throated Green Warblers on Migration. *The Wilson*  
463 *Bulletin*, 103(1), 93–96.
- 464 Newson, S. E., Bas, Y., Murray, A., & Gillings, S. (2017). Potential for coupling the monitoring of  
465 bush-crickets with established large-scale acoustic monitoring of bats. *Methods in Ecology and*  
466 *Evolution*, 8(9), 1051–1062. <https://doi.org/10.1111/2041-210X.12720>

- 467 Peach, W. J., Buckland, S. T., & Baillie, S. R. (1996). The use of constant effort mist-netting to measure  
468 between-year changes in the abundance and productivity of common passerines. *Bird Study*, 43(2),  
469 142–156. <https://doi.org/10.1080/00063659609461007>
- 470 Pebesma, E. J., & Bivand, R. (2005). Classes and methods for spatial data in R. Retrieved from R News  
471 5 (2) website: <https://cran.r-project.org/doc/Rnews/>
- 472 Penone, C., Le Viol, I., Pellissier, V., Julien, J. F., Bas, Y., & Kerbiriou, C. (2013). Use of large-scale  
473 acoustic monitoring to assess anthropogenic pressures on orthoptera communities. *Conservation*  
474 *Biology*, 27(5), 979–987. <https://doi.org/10.1111/cobi.12083>
- 475 R Core Team. (2020). *R: A Language and Environment for Statistical Computing*. Retrieved from  
476 <https://www.r-project.org/>
- 477 Ralph, C. J., Droege, S., & Sauer, J. R. (1995). Managing and Monitoring Birds Using Point Counts:  
478 Standards and Applications. *Workshop on Monitoring Bird Population Trends by Point Counts*,  
479 161–169.
- 480 Rappole, J. H., & Warner, D. W. (1976). Relationships between Behavior, Physiology and Weather in  
481 Avian Transients at a Migration Stopover Site. *Oecologia*, (26), 193–212.
- 482 Roark, E., & Gaul, W. (2020). Point Abbaye Stopover Habitat Monitoring Audio Files [Data set].  
483 Zenodo. <http://doi.org/10.5281/zenodo.3964574>
- 484 Roberts, D. R., Bahn, V., Ciuti, S., Boyce, M. S., Elith, J., Guillerá-Aroita, G., ... Dormann, C. F.  
485 (2017). Cross-validation strategies for data with temporal, spatial, hierarchical, or phylogenetic  
486 structure. *Ecography*, 40, 913–929. <https://doi.org/10.1111/ecog.02881>
- 487 Rosenstock, S. S., Anderson, D. R., Giesen, K. M., Leukering, T., & Carter, M. F. (2002). Landbird  
488 Counting Techniques : Current Practices and an Alternative Published. *The Auk*, 119(1), 46–53.  
489 <https://www.jstor.org/stable/4090011>
- 490 Salamon, J., Bello, J. P., Farnsworth, A., Robbins, M., Keen, S., Klinck, H., & Kelling, S. (2016).  
491 Towards the Automatic Classification of Avian Flight Calls for Bioacoustic Monitoring. *PloS*  
492 *ONE*, 11(11). <https://doi.org/10.1371/journal.pone.0166866>
- 493 Sanders, C. E., & Mennill, D. J. (2014). Acoustic monitoring of nocturnally migrating birds accurately  
494 assesses the timing and magnitude of migration through the Great Lakes. *The Condor*, 116(3),  
495 371–383. <https://doi.org/10.1650/condor-13-098.1>
- 496 Sherry, T. W., & Holmes, R. T. (1995). Summer versus winter limitation of populations: What are the  
497 issues and what is the evidence? In T. E. Martin & D. M. Finch (Eds.), *Ecology and management*  
498 *of Neotropical migratory birds: A synthesis and review of critical issues* (pp. 85–120).

499 Shonfield, J., & Bayne, E. M. (2017). Autonomous recording units in avian ecological research: current  
500 use and future applications. *Avian Conservation and Ecology*, 12(1). [https://doi.org/10.5751/ace-](https://doi.org/10.5751/ace-00974-120114)  
501 00974-120114

502 Tegeler, A. K., Morrison, M. L., & Szewczak, J. M. (2012). Using extended-duration audio recordings  
503 to survey avian species. *Wildlife Society Bulletin*, 36(1), 21–29. <https://doi.org/10.1002/wsb.112>

504 Tuneu-Corral, C., Puig-Montserrat, X., Flaquer, C., Mas, M., Budinski, I., & López-Baucells, A.  
505 (2020). Ecological indices in long-term acoustic bat surveys for assessing and monitoring bats'  
506 responses to climatic and land-cover changes. *Ecological Indicators*, 110(October 2019), 105849.  
507 <https://doi.org/10.1016/j.ecolind.2019.105849>  
508

509 United States Naval Observatory. (2016). Sun or Moon Rise/Set Table for One Year. Retrieved August  
510 30, 2019, from [https://aa.usno.navy.mil/data/docs/RS\\_OneYear.php](https://aa.usno.navy.mil/data/docs/RS_OneYear.php)  
511

## 512 **Figure and Table Captions**

513 *Figure 1:* Study area on the Point Abbaye Peninsula in Baraga County, Michigan, USA. Points denote  
514 survey locations visited during April and May of 2019. The survey area covers 2.7 km<sup>2</sup>. White lines on  
515 the left panel show unploughed four wheel drive roads which are impassible from early April to early  
516 May each year.

517  
518 *Figure 2:* The number of bird species detected by in-person point counts and automated recording units  
519 (ARUs) during the spring migration period on the Point Abbaye peninsula, Michigan, USA in 2019.  
520 Points show observed number of species detected, lines show predictions from a generalized linear  
521 mixed model, holding weather variables constant. See Box 1 for a description of the species richness  
522 index abbreviations. Listening to 10 random minutes of data from an ARU ( $S_{10R}$ ) allowed for detection  
523 of the same number of species as a 10 consecutive minute in-person point count ( $S_p$ ). Increasing survey  
524 effort to 22 random minutes of ARU data ( $S_{22R}$ ) increased the number of species detected to above the  
525 number of species detected by in-person point counts.

526

527 *Figure 3:* Predicted (lines) and observed (points) relative abundance of (a) through (d) Winter Wren,  
528 and (e) through (h) Golden-crowned Kinglet, in April and May of 2019 on the Point Abbaye peninsula.  
529 Points show observed values for each abundance index, while lines show the mean predicted values  
530 from 200 five-fold cross validated boosted regression tree models. The vertical axes show the daily  
531 abundance index value (see Box 1) calculated from: (a) and (e) three 10-minute in person point counts,  
532 (b) and (f) three samples of 10 consecutive minutes of audio recordings from automated recording units  
533 (ARUs), (c) and (g) three samples of 10 randomly selected minutes of audio recordings from ARUs, (d)  
534 and (h) three samples of 22 randomly selected minutes of audio recordings from ARUs.

535

536 *Figure 4:* Correlation between daily observed values of relative abundance indices (Box 1) for Winter  
537 Wren. See Table 2 for Spearman's correlation coefficients for each plot. Abundance indices for ARUs  
538 (the proportion of 30-second intervals with a vocalization) are correlated with the abundance index  
539 from point counts (mean number of individuals observed per count per day). Note that axis scales vary  
540 by abundance index; absolute values are less important here than the relationship between observations.  
541 Photo: "Winter Wren" by ilouque, used under license CC BY 2.0. Cropped from original.

542

543 *Figure 5:* Correlation between daily observed values of relative abundance indices (Box 1) for Golden-  
544 crowned Kinglet. See Table 2 for Spearman's correlation coefficients for each plot. Abundance indices  
545 for ARUs (the proportion of 30-second intervals with a vocalization) are correlated with the abundance  
546 index from point counts (mean number of individuals observed per count per day). Note that axis scales  
547 vary by abundance index; absolute values are less important here than the relationship between

548 observations. Photo: “Golden-crowned Kinglet” by Laura Gooch, used under license CC BY-NC-SA

549 2.0. Cropped from original.

550

551 *Box 1:* Indices of relative abundance and species richness for both in-person point count observations,  
552 and desk-based listening counts using audio data from Automated Recording Units (ARUs).

553

554 *Table 1:* Results of a generalized linear mixed model of the number of species detected as a function of  
555 day of year, count type and environmental condition covariates. Each variable included in the model is  
556 shown, along with the coefficient point estimate, 95% confidence interval, and significance level.

557 \*denotes  $p < 0.05$ , \*\* denotes  $p < 0.01$ , \*\*\* denotes  $p < 0.001$

558

559 *Table 2:* Spearman's rank correlation coefficients for each combination of abundance indices. We did  
560 not report a correlation for  $A_{30R}$  and  $A_{66R}$  because  $A_{30R}$  data is a subset of  $A_{66R}$  data.



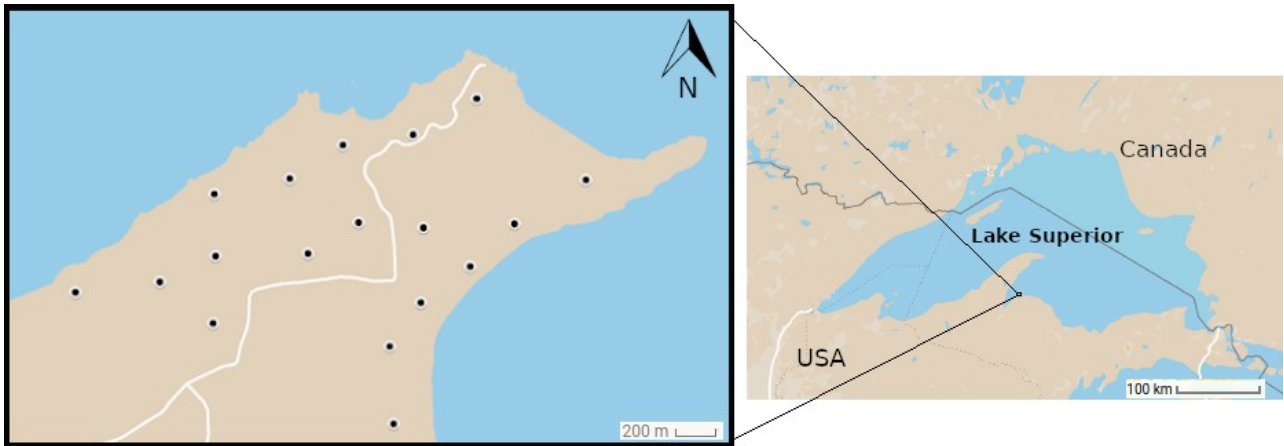

562 *Figure 1*  
563  
564  
565

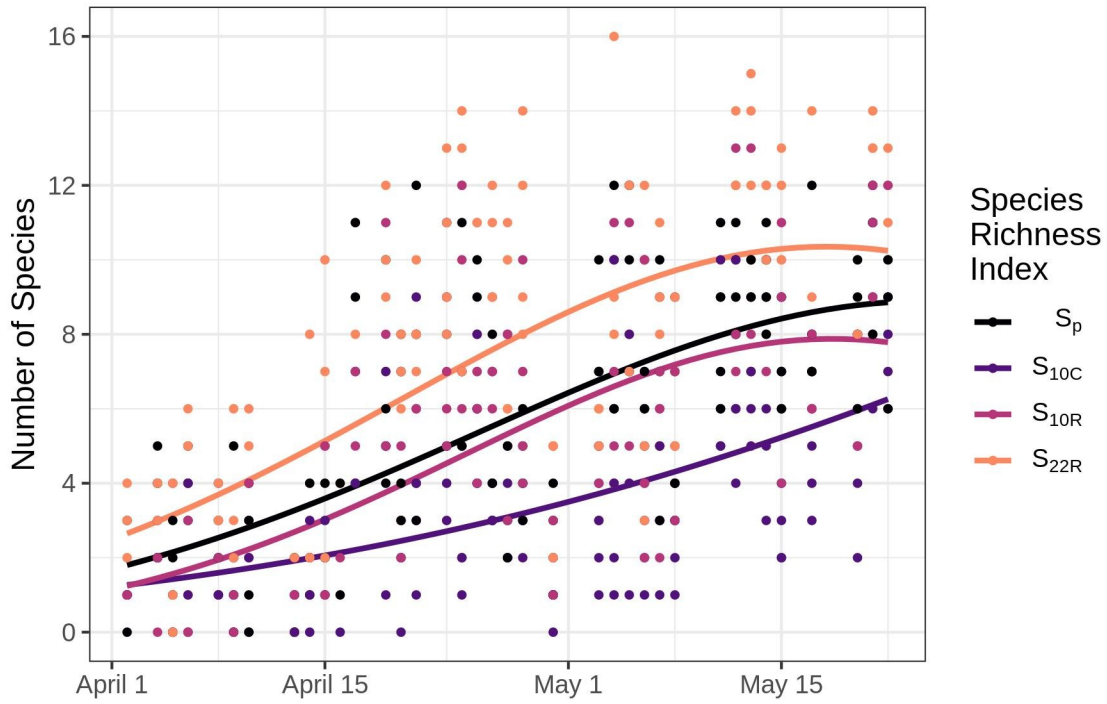

566  
567 *Figure 2*

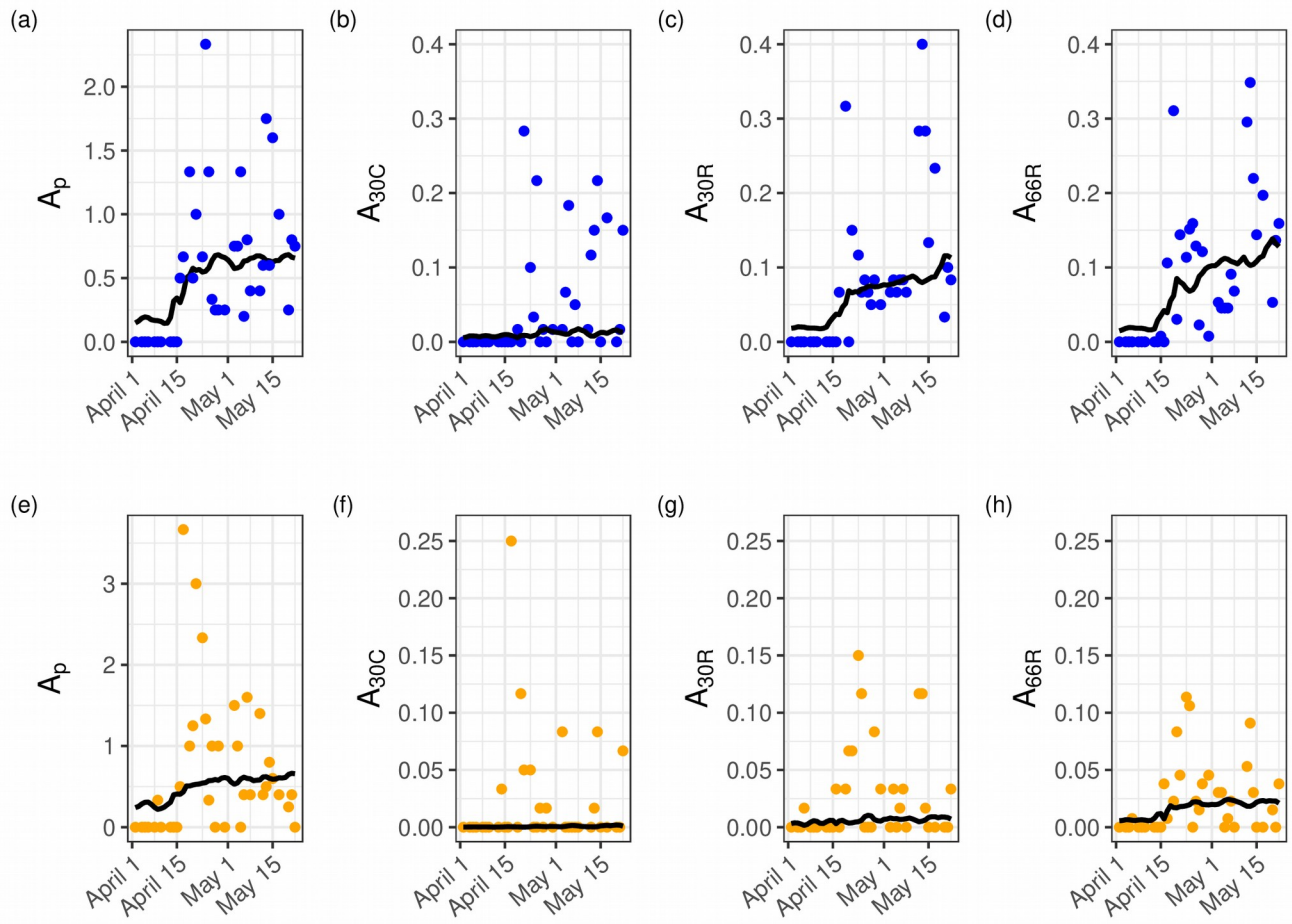

568 *Figure 3*

569

570

571

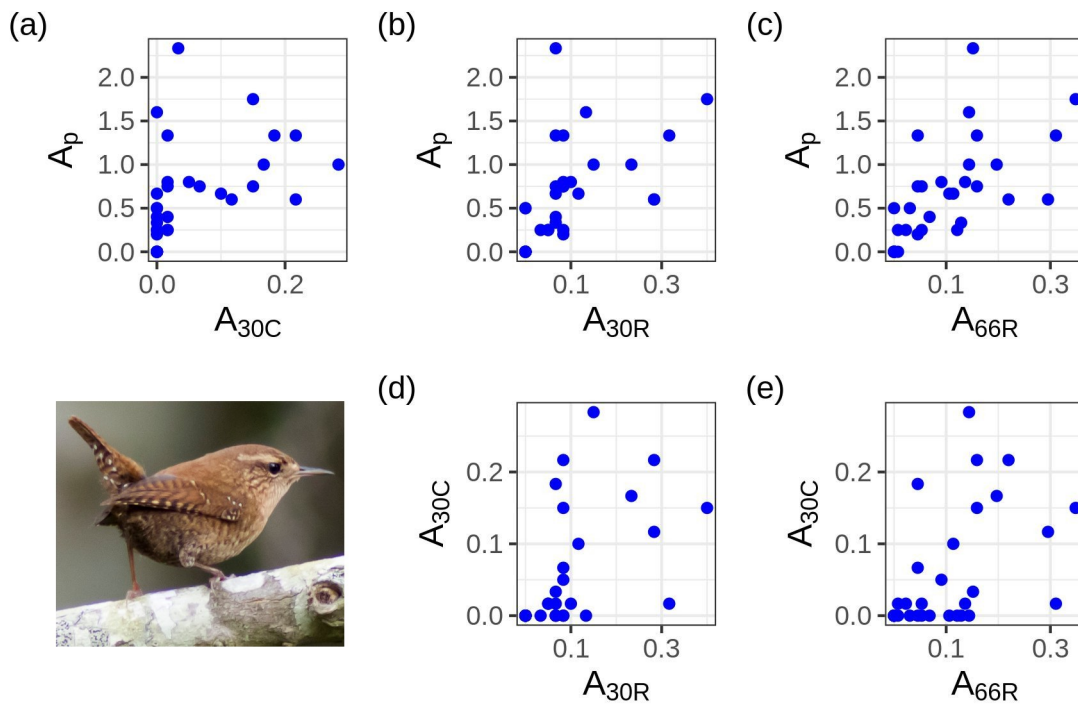

572 *Figure 4*

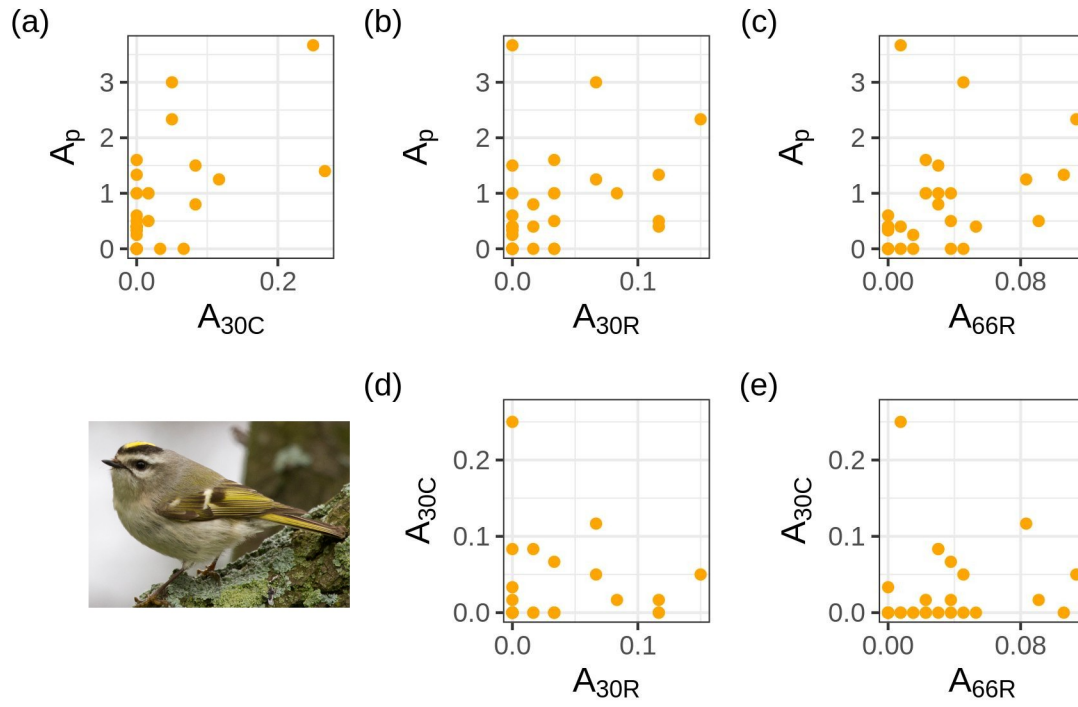

574 Figure 5

Box 1

| <b>Index Abbreviation</b> | <b>Survey type</b>       | <b>Temporal continuity</b> | <b>Measured Value</b>                                                                                                                                                                                       |
|---------------------------|--------------------------|----------------------------|-------------------------------------------------------------------------------------------------------------------------------------------------------------------------------------------------------------|
| $A_p$                     | Point count              | Consecutive                | Relative abundance measured as the mean number of observed individuals per 10 minute point count per day                                                                                                    |
| $A_{nC}$                  | Automated Recording Unit | Consecutive                | Relative abundance measured as the proportion of 30 second intervals with a vocalization calculated by surveying $n$ minutes in sections of 10 consecutive minutes                                          |
| $A_{nR}$                  | Automated Recording Unit | Random                     | Relative abundance measured as the proportion of 30 second intervals with a vocalization calculated by surveying $n$ minutes in sections of 1 minute chosen randomly from the full five hour survey window. |
| $S_p$                     | Point count              | Consecutive                | Number of species detected during a 10 minute in person point count                                                                                                                                         |
| $S_{nC}$                  | Automated Recording Unit | Consecutive                | Number of species detected during $n$ consecutive minutes, in sections of 10 consecutive minutes                                                                                                            |
| $S_{nR}$                  | Automated Recording Unit | Random                     | Number of species detected during $n$ minutes, chosen randomly from the full five hour survey window                                                                                                        |

576

Table 1

| Variable                                                   | Coefficient estimate | 95% CI lower bound | 95% CI upper bound | P-value    |
|------------------------------------------------------------|----------------------|--------------------|--------------------|------------|
| Survey type (S <sub>10C</sub> )                            | -0.6146              | -0.7824            | -0.4467            | <0.0001*** |
| Survey type (S <sub>10R</sub> )                            | -0.065               | -0.213             | 0.0829             | 0.3888     |
| Survey type (S <sub>22R</sub> )                            | 0.3056               | 0.1702             | 0.441              | <0.0001*** |
| Wind (2)                                                   | -0.0301              | -0.135             | 0.0748             | 0.574      |
| Wind (3+)                                                  | -0.1007              | -0.2644            | 0.0629             | 0.2277     |
| Rain (Wet)                                                 | -0.1984              | -0.4624            | 0.0657             | 0.1409     |
| Noise (1)                                                  | 0.1552               | 0.0595             | 0.251              | 0.0015**   |
| Noise (>2)                                                 | 0.0544               | -0.147             | 0.2557             | 0.5967     |
| Day of year                                                | 0.4346               | 0.305              | 0.5641             | <0.0001*** |
| Day of year <sup>2</sup>                                   | -0.1159              | -0.2496            | 0.0178             | 0.0892     |
| Survey type (S <sub>10C</sub> ) x Rain (Wet)               | -0.0163              | -0.3944            | 0.3617             | 0.9325     |
| Survey type (S <sub>10R</sub> ) x Rain (Wet)               | 0.1861               | -0.1374            | 0.5096             | 0.2595     |
| Survey type (S <sub>22R</sub> ) x Rain (Wet)               | 0.2288               | -0.0677            | 0.5252             | 0.1304     |
| Survey type (S <sub>10C</sub> ) x Day of Year              | 0.0153               | -0.1191            | 0.1498             | 0.823      |
| Survey type (S <sub>10R</sub> ) x Day of Year              | 0.0595               | -0.0659            | 0.1849             | 0.3525     |
| Survey type (S <sub>22R</sub> ) x Day of Year              | -0.0709              | -0.1808            | 0.0389             | 0.2058     |
| Survey type (S <sub>10C</sub> ) x Day of year <sup>2</sup> | 0.086                | -0.048             | 0.2199             | 0.2083     |
| Survey type (S <sub>10R</sub> ) x Day of year <sup>2</sup> | -0.0583              | -0.1825            | 0.0659             | 0.3575     |
| Survey type (S <sub>22R</sub> ) x Day of year <sup>2</sup> | -0.0148              | -0.125             | 0.0953             | 0.7917     |

577

Table 2

| <b>Relative Abundance Index Pairs</b> |           | <b>Golden-crowned Kinglet</b>         |                                        | <b>Winter Wren</b>                    |                                        |
|---------------------------------------|-----------|---------------------------------------|----------------------------------------|---------------------------------------|----------------------------------------|
|                                       |           | <i>Correlation of Observed Values</i> | <i>Correlation of Predicted Values</i> | <i>Correlation of Observed Values</i> | <i>Correlation of Predicted Values</i> |
| $A_P$                                 | $A_{30C}$ | 0.532                                 | 0.794                                  | 0.72                                  | 0.822                                  |
| $A_P$                                 | $A_{30R}$ | 0.499                                 | 0.652                                  | 0.781                                 | 0.882                                  |
| $A_P$                                 | $A_{66R}$ | 0.588                                 | 0.813                                  | 0.817                                 | 0.854                                  |
| $A_{30C}$                             | $A_{30R}$ | 0.286                                 | 0.817                                  | 0.716                                 | 0.757                                  |
| $A_{30C}$                             | $A_{66R}$ | 0.485                                 | 0.897                                  | 0.676                                 | 0.736                                  |

578
